# Supplementary material for: Auranofin Inhibits RANKL-Induced Osteoclastogenesis by Suppressing Inhibitors of κB Kinase and Inflammasome-Mediated Interleukin-1β Secretion
Source: PubMed Central journal article supplement (PMC6561666; doi:10.1155/2019/3503912), 2019-04-22
Supplement: 3503912.f1.pdf [file 3503912.f1.pdf]

# Supplementary figure 1

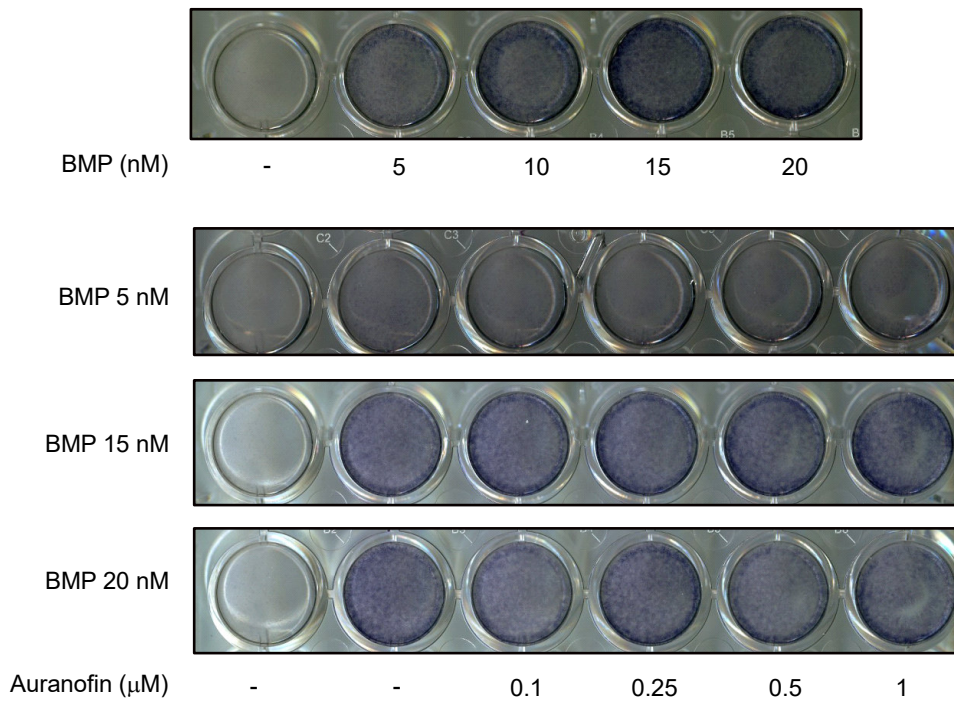

**Supplementary figure 1. Alkaline phosphatase (ALP) staining.** Osteoblast differentiation of C2C12 cells were induced by bone morphogenetic protein (BMP). ALP staining were performed to evaluate the effect of auranofin on the differentiation capacity.
